# Supplementary material for: Hierarchical porous carbon nanosheets and their favorable high-rate performance in lithium ion batteries
Source: Royal Society of Chemistry journal article supplement (doi:10.1039/c2jm31910a), 2012-01-01
Supplement: c2jm31910a.pdf [file c2jm31910a.pdf]

Cite this: DOI: 10.1039/c0xx00000x

PAPER

www.rsc.org/materials

## Supplementary Information

# Hierarchical Porous Carbon Nanosheets and their Favorable High-Rate Performance in Lithium Ion Batteries

Ranran Song,<sup>a</sup> Huaihe Song,<sup>\*a</sup> Jisheng Zhou,<sup>a</sup> Xiaohong Chen,<sup>a</sup> Bin Wu,<sup>a</sup> and Huiying Yang<sup>b</sup>

<sup>s</sup> Received (in XXX, XXX) Xth XXXXXXXXXX 200X, Accepted Xth XXXXXXXXXX 200X

DOI: 10.1039/b000000x

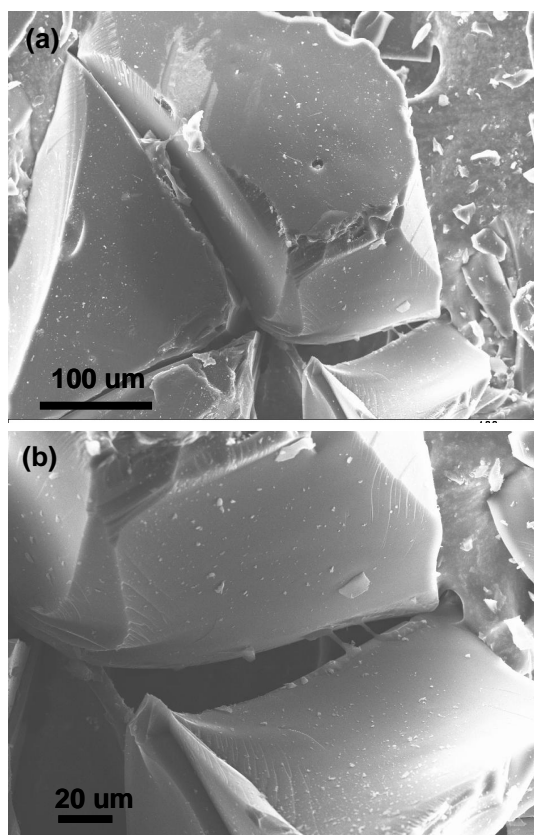

Figure S1. SEM images of GC ((a) and (b))

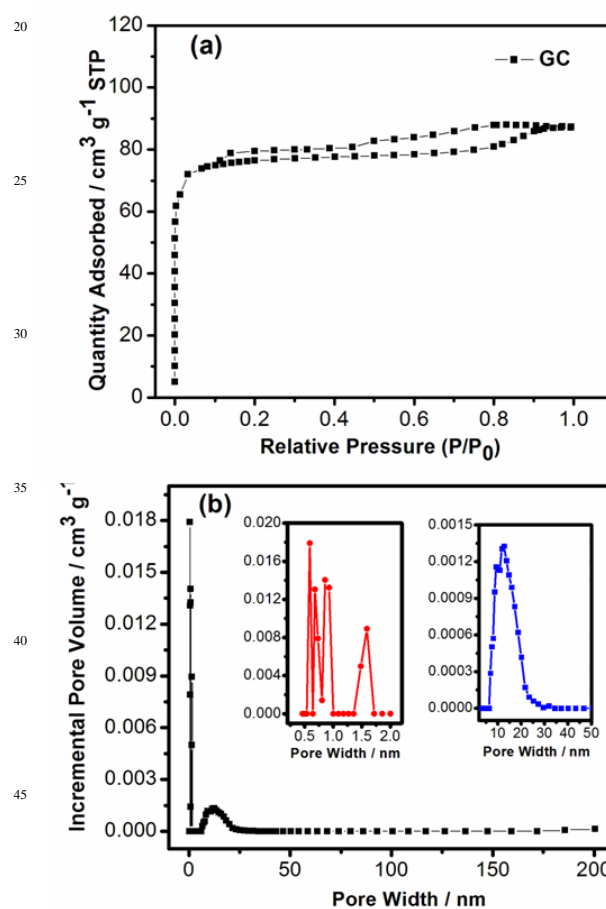

Figure S2. (a) Nitrogen adsorption/desorption isotherms of GC and (b) its pore-size distribution using DFT equation.

10

15

55

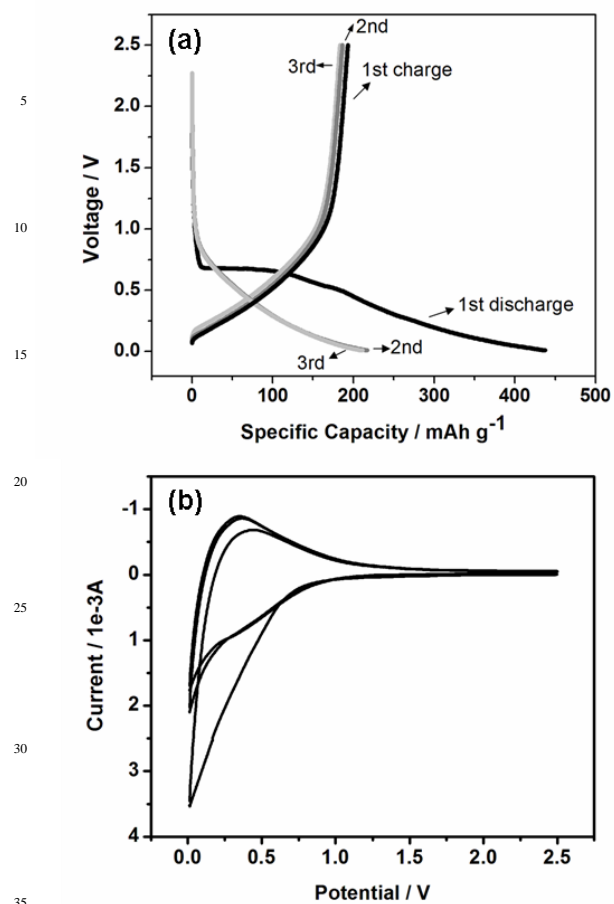

**Figure S3.** (a) Galvanostatic discharge/charge curves of GC electrode at a current density of 20 mA g<sup>-1</sup> and (b) Cyclic voltammetry curve of GC electrode.
